# Supplementary material for: High Intensity Focused Ultrasound‐Driven Nanomotor for Effective Ferroptosis‐Immunotherapy of TNBC
Source: PubMed Central journal article supplement (PMC11022700; doi:10.1002/advs.202305546), 2024-02-11
Supplement: ADVS-11-2305546-s001.pdf [file ADVS-11-2305546-s001.pdf]

## Supporting Information

for *Adv. Sci.*, DOI 10.1002/adv.202305546

High Intensity Focused Ultrasound-Driven Nanomotor for Effective  
Ferroptosis-Immunotherapy of TNBC

*Xiangrong Yu, Xuejing Li, Qingwang Chen, Siyu Wang, Ruizhe Xu, Ying He, Xifeng Qin, Jun Zhang, Wuli Yang, Leming Shi, Ligong Lu\*, Yuanting Zheng\*, Zhiqing Pang\* and Shaojun Peng\**

## Supporting Information

### **High Intensity Focused Ultrasound-driven Nanomotor for Effective Ferroptosis-immunotherapy of TNBC**

*Xiangrong Yu, Xuejing Li, Qingwang Chen, Siyu Wang, Ruizhe Xu, Ying He, Xifeng Qin, Jun Zhang, Wuli Yang, Leming Shi, Ligong Lu, \*Yuanting Zheng, \*Zhiqing Pang, \* Shaojun Peng\**

(Xiangrong Yu, Xuejing Li and Qingwang Chen contributed equally to this work)

Xiangrong Yu, Ligong Lu, Shaojun Peng

Guangdong Provincial Key Laboratory of Tumor Interventional Diagnosis and Treatment Zhuhai People's Hospital (Zhuhai Hospital Affiliated with Jinan University)

Zhuhai, Guangdong 519000, P. R. China

E-mail: [luligong1969@jnu.edu.cn](mailto:luligong1969@jnu.edu.cn); [shaojunpeng@ext.jnu.edu.cn](mailto:shaojunpeng@ext.jnu.edu.cn)

Xuejing Li, Siyu Wang, Ruizhe Xu, Ying He, Xifeng Qin, Zhiqing Pang

Key Laboratory of Smart Drug Delivery, School of Pharmacy,

Fudan University,

Shanghai, 201203, P.R. China

E-mail: [zqpang@fudan.edu.cn](mailto:zqpang@fudan.edu.cn)

Qingwang Chen, Leming Shi, Yuanting Zheng

State Key Laboratory of Genetic Engineering, School of Life Sciences and Human Phenome Institute

Fudan University, 2005 Songhu Road,

Shanghai 200438, P.R. China

E-mail: [zhengyuanting@fudan.edu.cn](mailto:zhengyuanting@fudan.edu.cn)

Jun Zhang

Department of Radiology, Huashan Hospital, State Key Laboratory of Medical

Neurobiology

Fudan University, 12 Wulumuqi Middle Road

Shanghai 200040, China

Wuli Yang

State Key Laboratory of Molecular Engineering of Polymers & Department of

Macromolecular Science

Fudan University

Shanghai 200433, China

## **Methods**

### **Cytotoxicity of GA on 4T1 cells**

4T1 cells were seeded onto a 96-well plate at the density of 104 cells per well and cultured overnight. Afterward, cells were incubated with various concentrations of GA for 24 h and the cell viability was tested by the CCK-8 assay.

Considering that thioredoxin (TRX) is the main target of GA, the TRX concentration in tumor cells after GA treatment was analyzed by ELISA assay. Briefly, 4T1 cells were seeded in 12-well plates at a density of  $1 \times 10^5$  cells per well and cultured overnight. Afterward, cells were treated with GA (1.0  $\mu\text{g}/\text{mL}$ ) for 24 h. After that, cells were collected, lysed in an ice-bath, and spin down, and the TRX concentration in the supernatant was analyzed by using the TRX ELISA assay kit according to the manufacturer's instructions. Cells treated with PBS was used as control.

### ***Ex vivo* cavitation ability of nanomotors under HIFU irradiation**

The pork liver models were prepared in degassed water and received an injection of 100  $\mu\text{L}$  of NP-G/P (5 mg/mL).<sup>[32]</sup> Pork livers injected with an equal volume of PBS or NP (5 mg/mL) served as controls. Then, the injection site was exposed to HIFU irradiation at 8.5W for 30 s. The cross-sectional digital images of the treated pork livers cut along the direction of HIFU irradiation were recorded and the radiation volume of HIFU was measured by the following formula:  $\text{Volume} = \pi/4 \times W^2 \times D$  (W: width, D: depth).

### **Primary assessment of the biosafety**

Healthy BABL/c mice and TNBC-bearing mice were sacrificed at the end of the experiment, and the major organs including the heart, liver, spleen, lung, and kidneys were excised and embedded in paraffin. Then these tissues were sectioned for hematoxylin and eosin (H&E) staining to observe the histological changes. The blood was also collected to perform the routine blood test, including the ratio of lymph, the concentrations of RBCs, white blood cells (WBCs), hemoglobin (HGB), platelets (PLTs), mean corpuscular hemoglobin (MCH), mean corpuscular volume (MCV), and red cell volume distribution width (RDW). Blood samples were collected from healthy mice for blood biochemical analysis, including measurements of aspartate aminotransferase (AST), alkaline phosphatase (ALP), alanine transaminase (ALT), creatinine (CRE), and blood urea nitrogen (BUN).

### **Statistical analysis**

All the data were expressed as mean  $\pm$  standard deviation (SD). The difference between two groups was analyzed using the Student's *t*-test. One-way analysis of variance (ANOVA) followed by Tukey's *post hoc* test was used to determine differences between multiple groups.

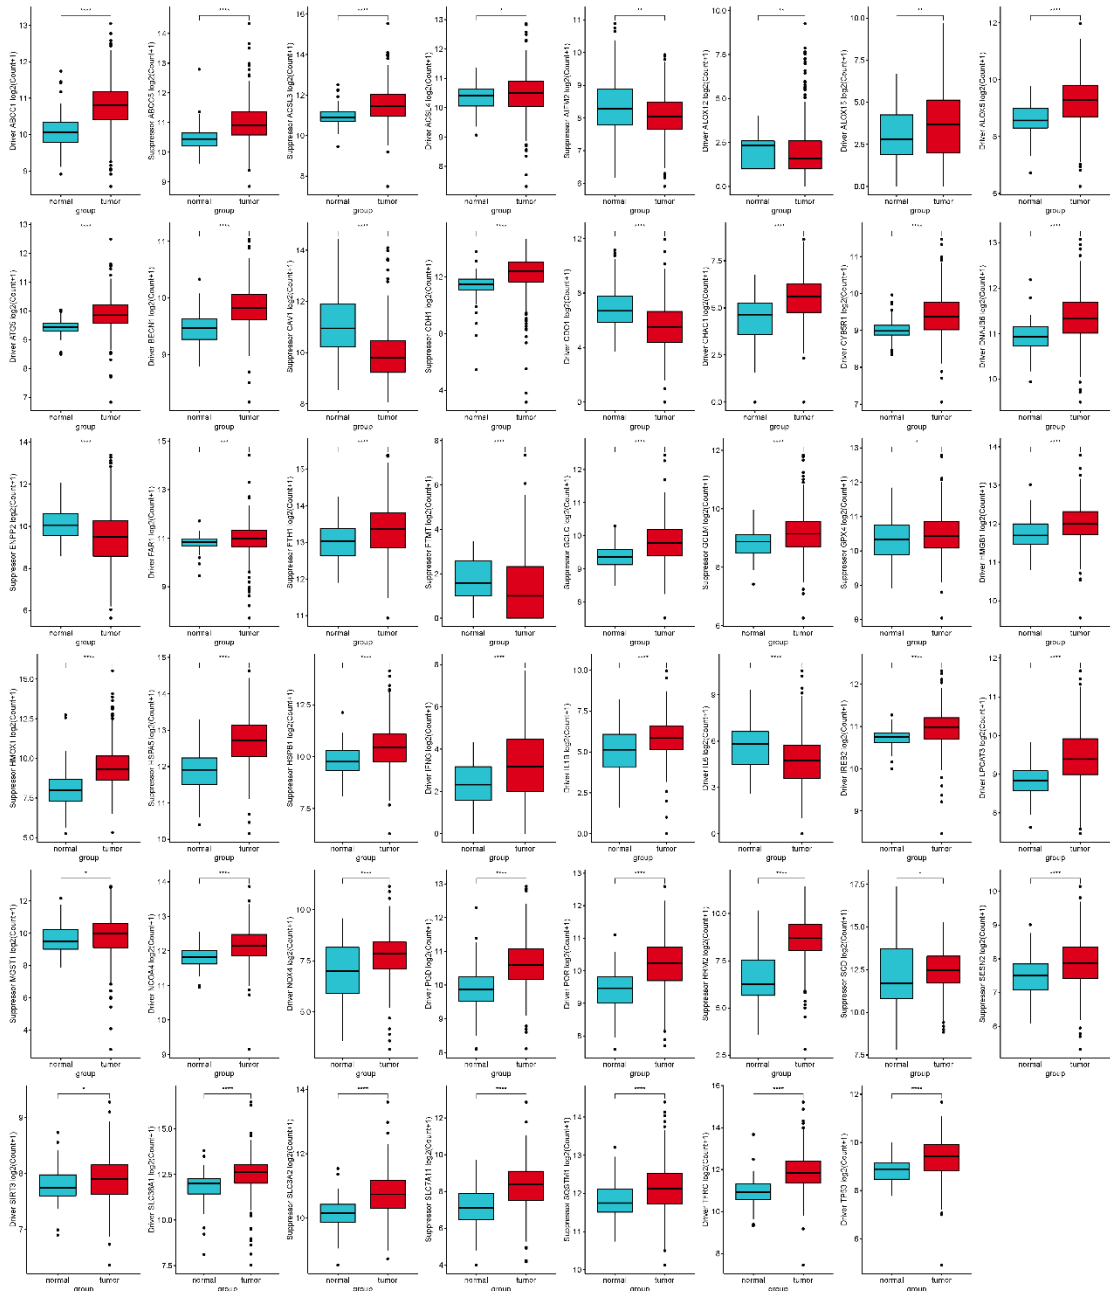

**Figure S1.** Box plots of the expression levels of 47 typical ferroptosis-associated genes in TNBC and normal breast tissues from FUSCCTNBC cohort. \* $P < 0.05$ , \*\* $P < 0.01$ , \*\*\* $P < 0.001$ , and \*\*\*\* $P < 0.0001$ .

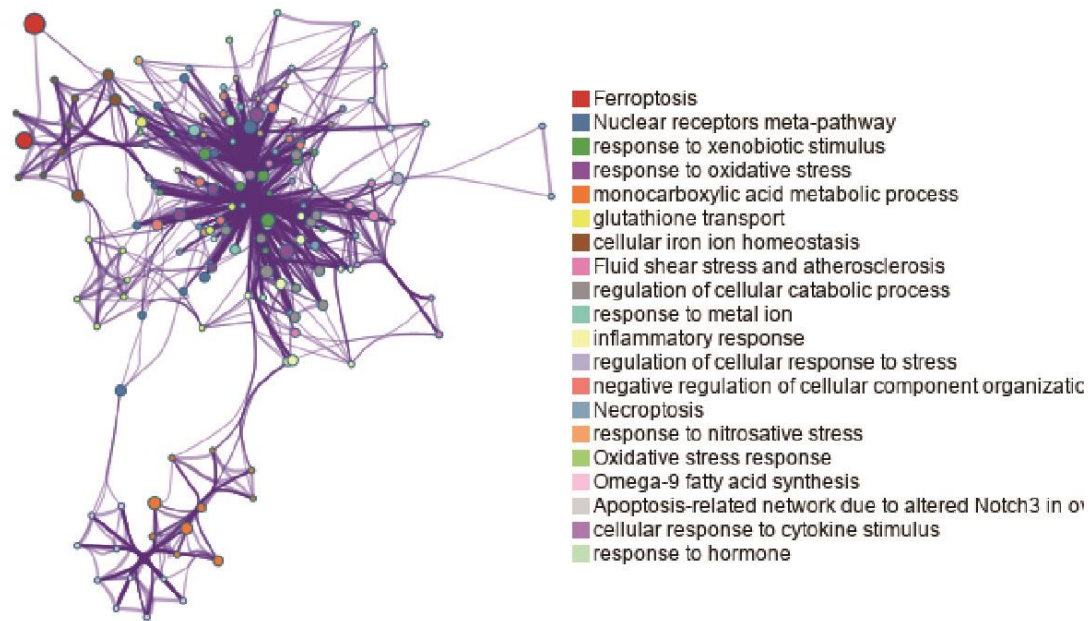

**Figure S2.** Gene Ontology (GO) enrichment analysis of 47 typical ferroptosis-associated genes.

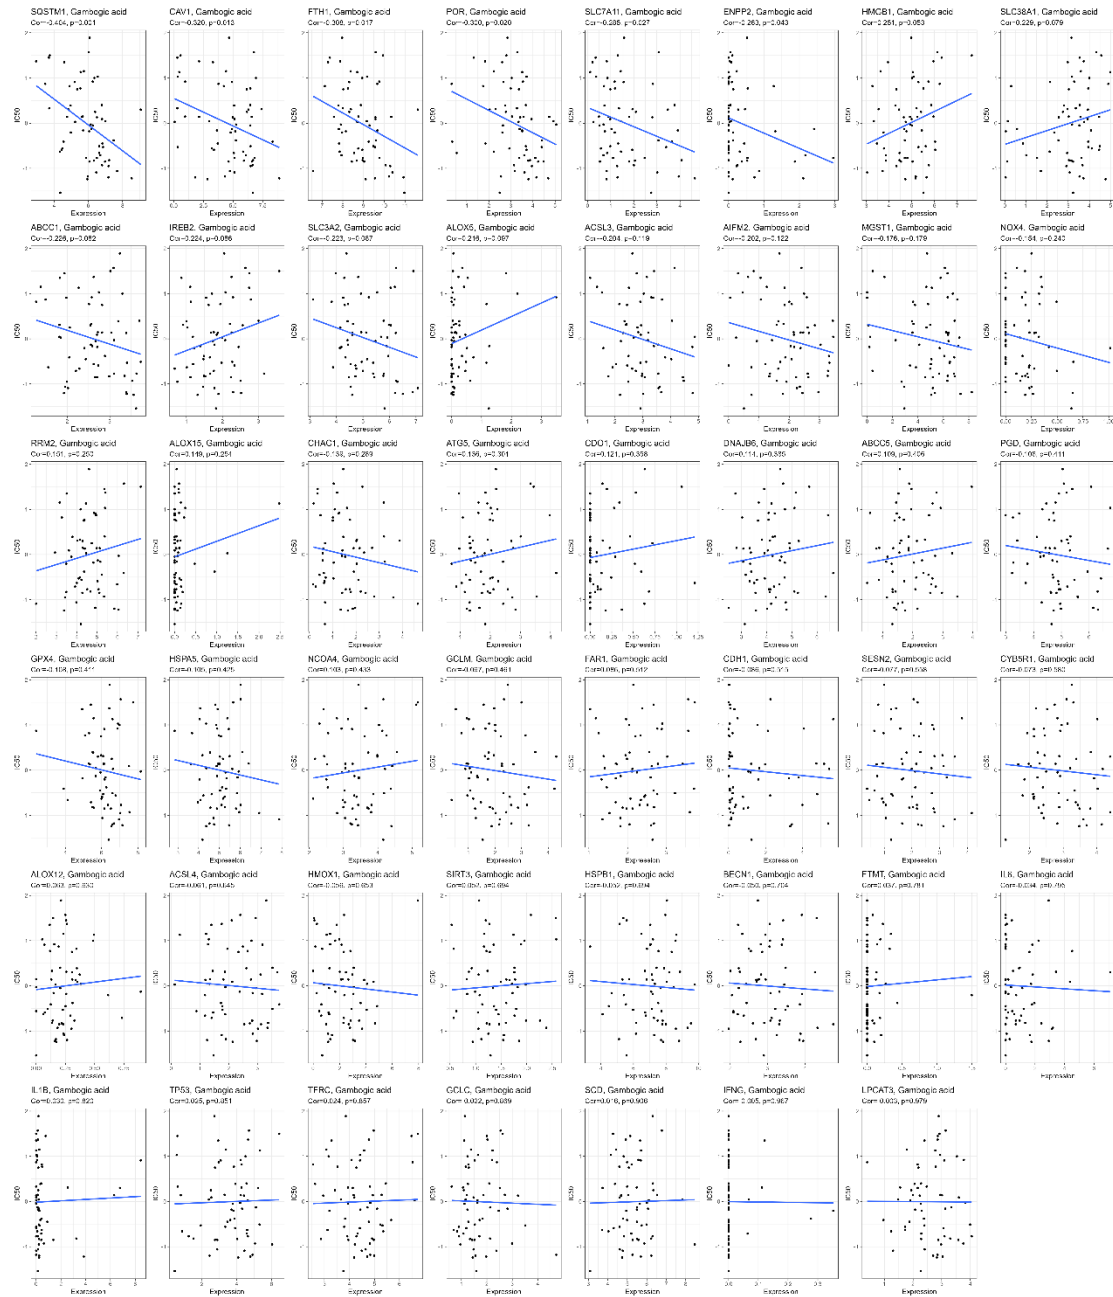

**Figure S3.** The scatter plots showed the correlation between the expression levels of ferroptosis-related genes and the IC50 value of GA.

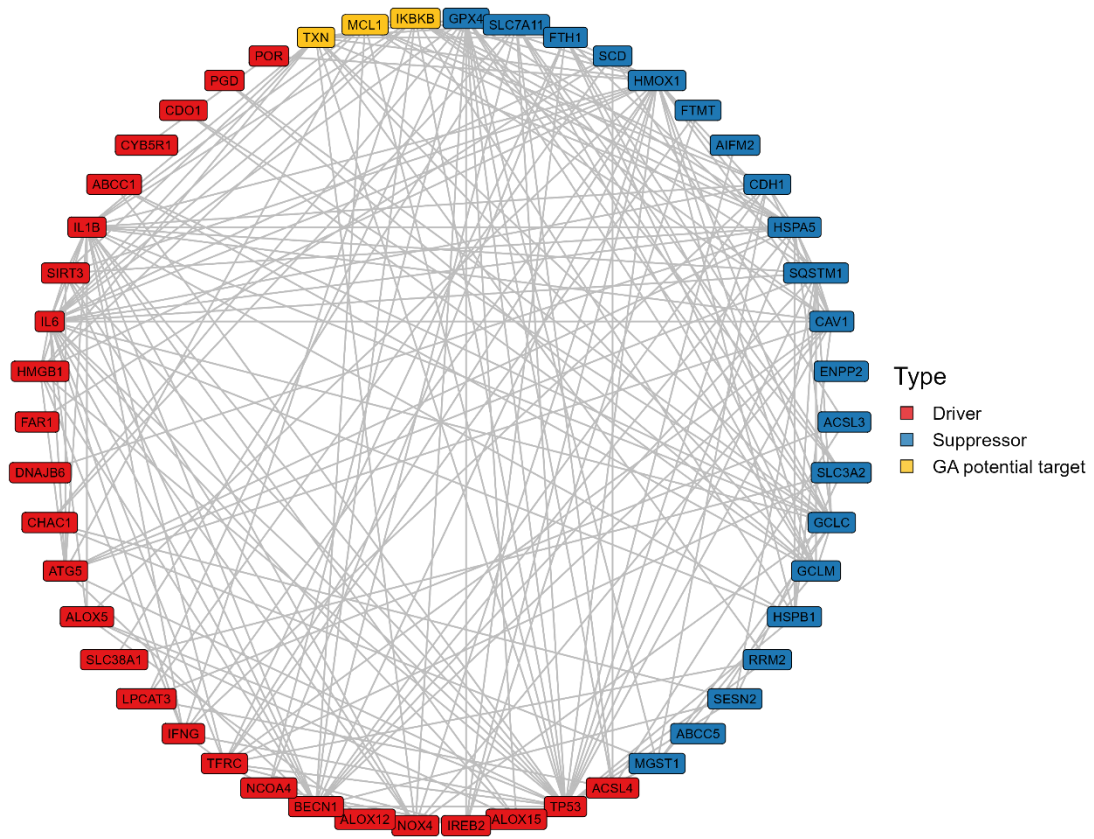

**Figure S4.** Protein-protein interaction (PPI) network of potential target proteins and ferroptosis regulators.



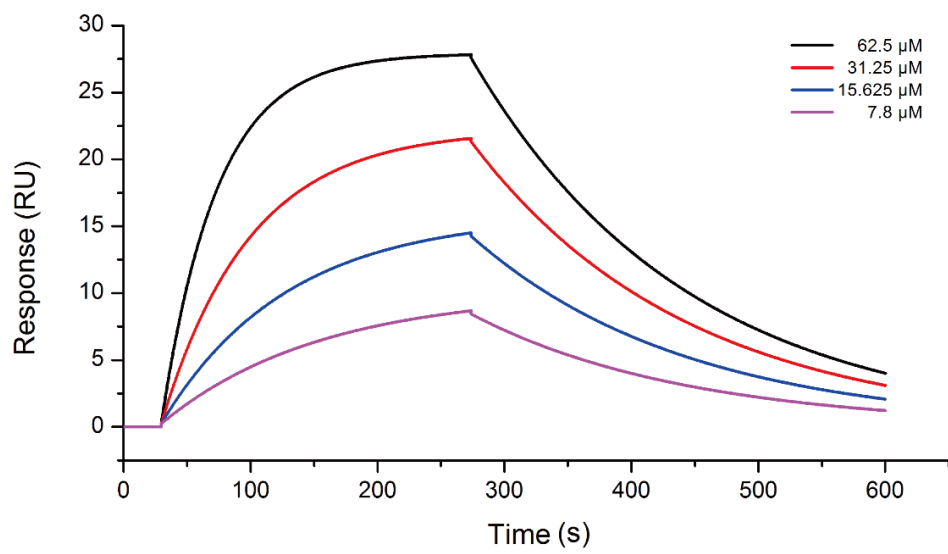

**Figure S5.** Surface plasmon resonance analysis of the affinity between GA and thioredoxin (TRX).

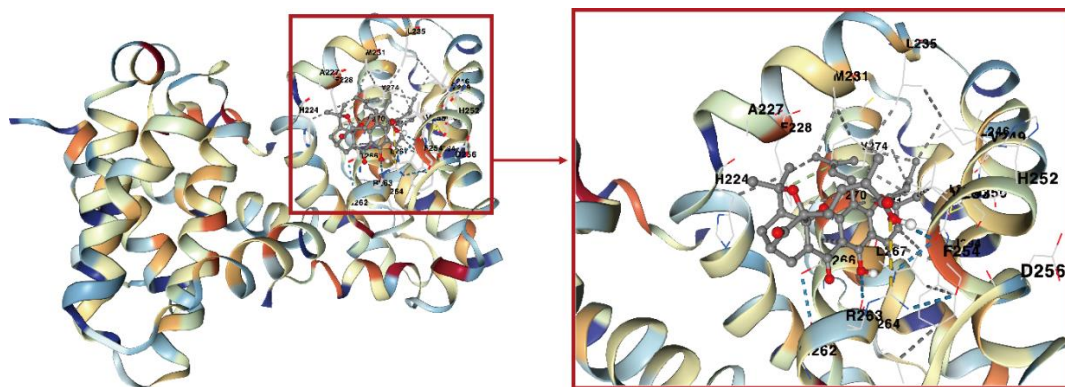

**Figure S6.** Structures of the MCL1 protein and GA combination predicted with crystal molecular docking.

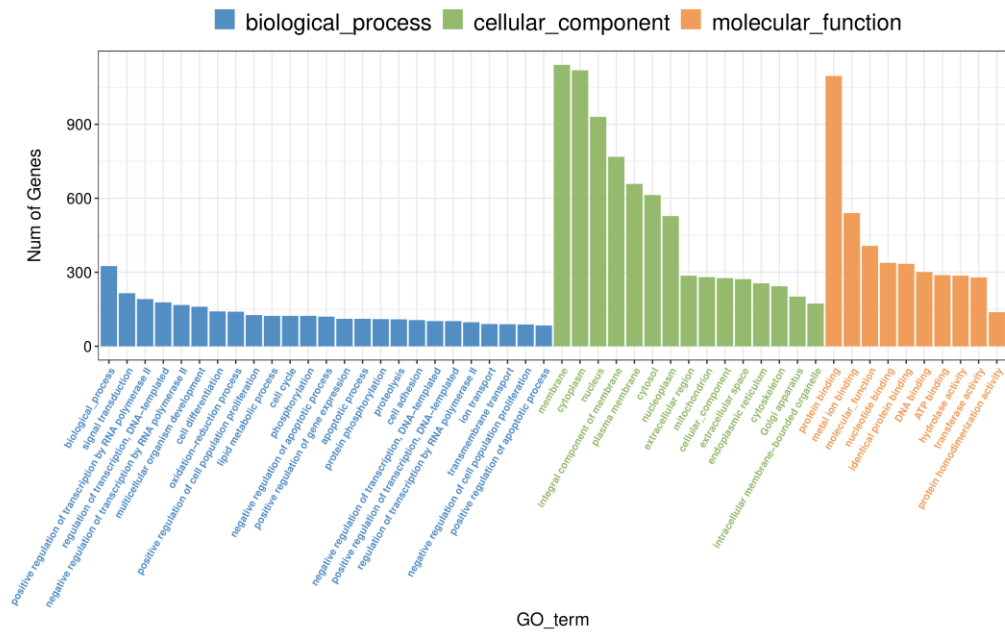

**Figure S7.** GO enrichment analysis of gene expression in GA-treated 4T1 cells.

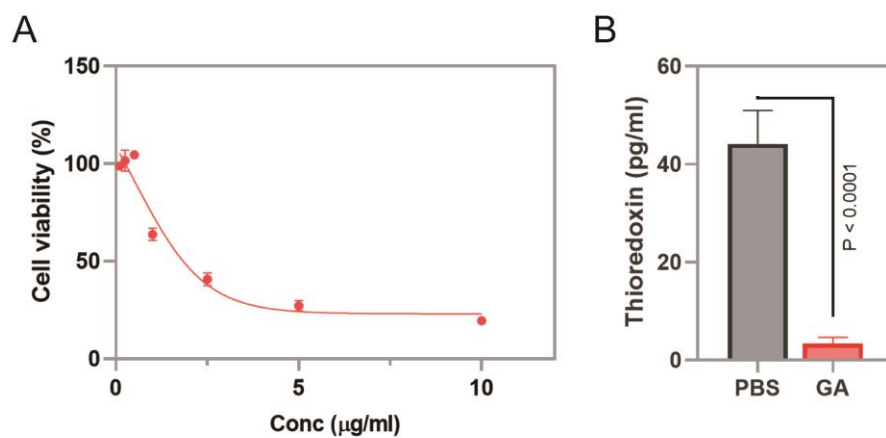

**Figure S8.** (A) The cell viability of 4T1 cells after GA treatment determined by the Cell-Counting Kit 8 (CCK-8) (n=3). (B) The intracellular concentration of thioredoxin (TRX) in GA-treated 4T1 cells (n=3).

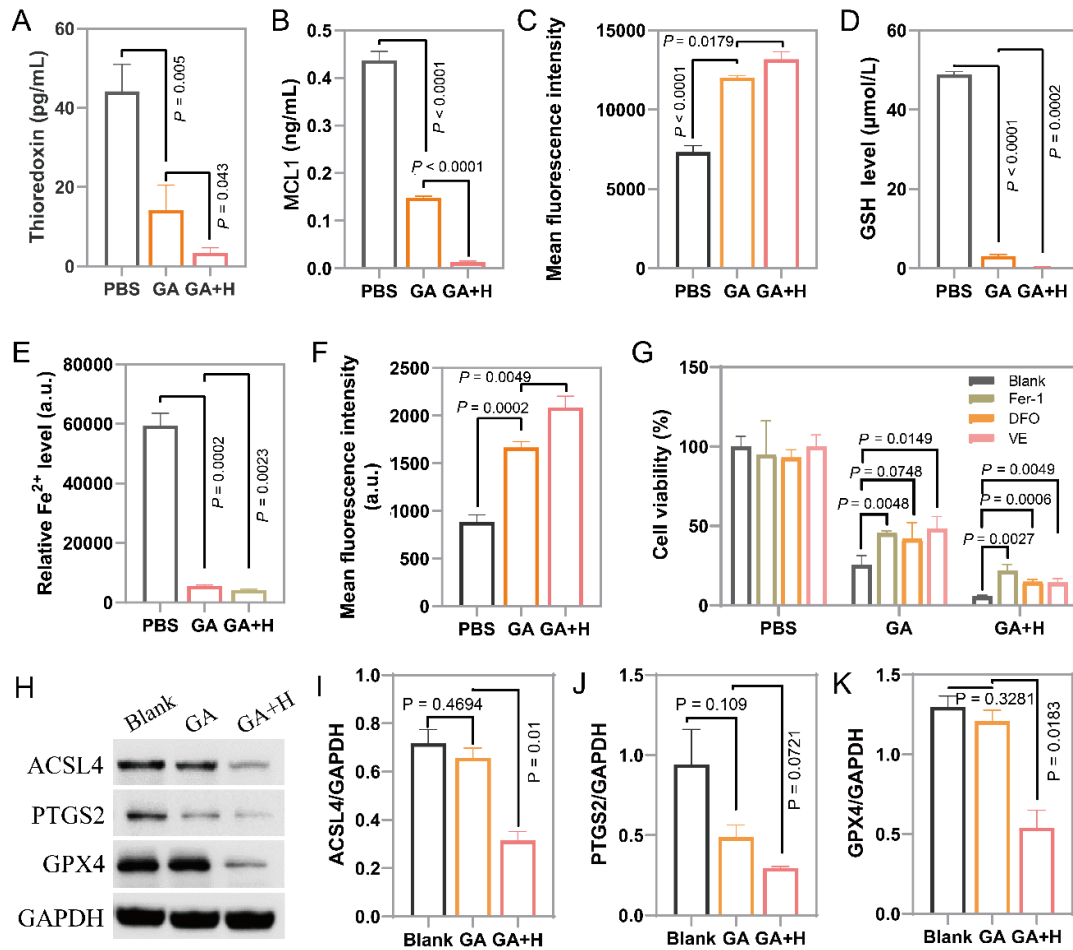

**Figure S9.** (A, B) The intracellular thioredoxin (A) and MCL1 (B) concentrations in 4T1 cells after different treatments (n=3). (C) Relative ROS levels in 4T1 cells after various treatments. (D) Intracellular GSH concentration in 4T1 cells after various treatments (n=3). (E) The relative expression level of Fe (II) in 4T1 cells after various treatments (n=3). (F) The intracellular LPO level in 4T1 cells after various treatments (n=3). (G) The cell viability of 4T1 cells that received different treatments in the presence of different ferroptosis inhibitors including Fer-1, DFO, and vitamin E (n=3). Western blot analyses of ACSL4, PTGS2, and GPX4 expressions (H) in 4T1 cells after GA and GA+H treatments and the corresponding semi-quantitation results (I-K).

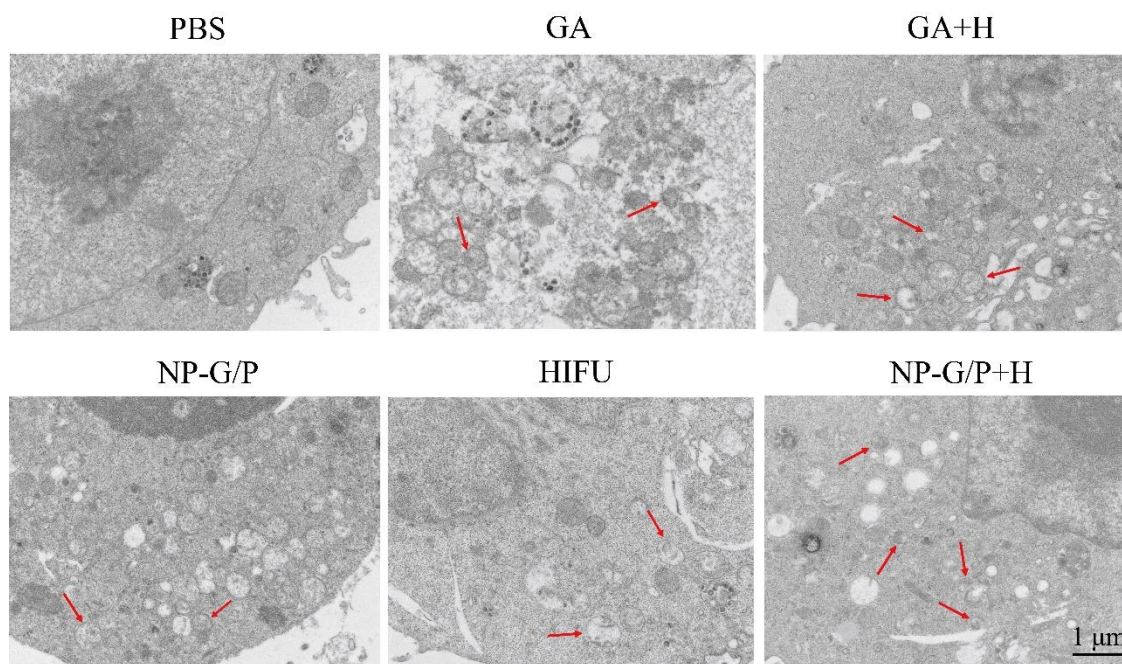

**Figure S10.** Identification of changes in mitochondrial features in 4T1 cells after different treatments through TEM imaging. Red arrowheads, ferroptotic mitochondria.

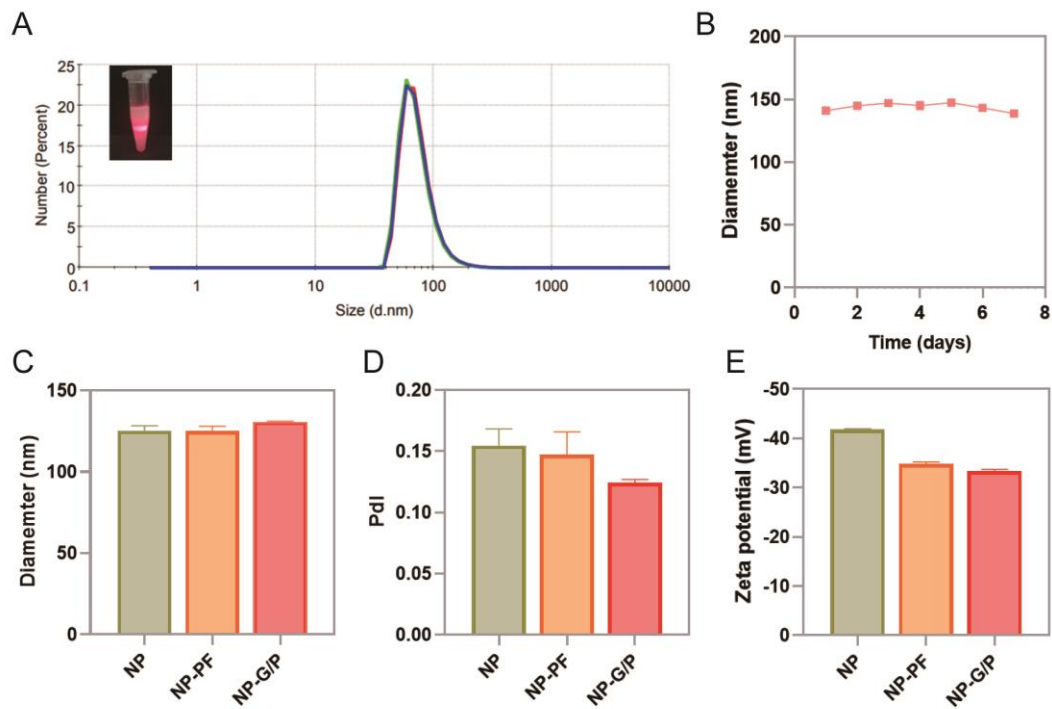

**Figure S11.** Characterization of nanomotors. (**A and B**) The number-based size distribution (**A**) and the mean size (**B**) of NP-G/P stored in PBS at 4 °C for 7 days (n=3). (**C to E**) The mean size (**C**), polydispersity index (PdI) (**D**), and zeta potential (**E**) of different nanoparticles (n=3).

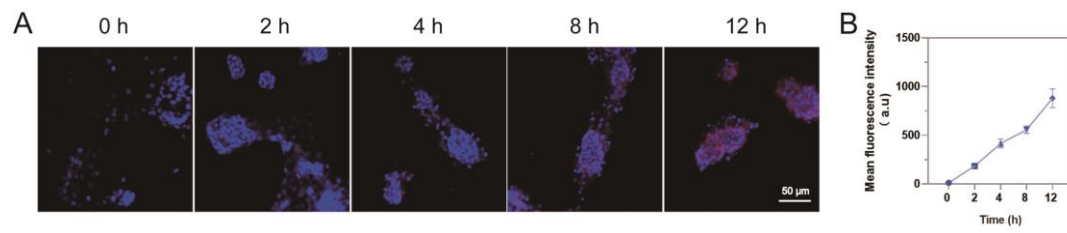

**Figure S12.** Cellular uptake of NP-G/P by 4T1 cells. **(A)** Representative fluorescence images of 4T1 cells treated with DiD-labeled NP-G/P for different times (n=3). **(B)** the fluorescence intensity of 4T1 cells treated with DiD-labeled NP-G/P for different times was determined by flow cytometry (n=3).



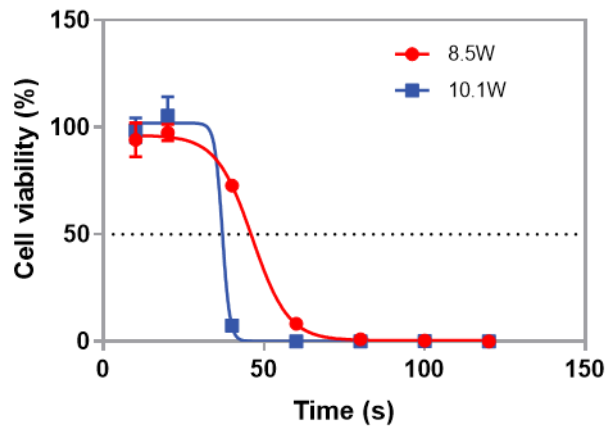

**Figure S13.** The cell viability of 4T1 cells after HIFU treatment with different powers and irradiation times determined by the CCK-8 method (n=3).

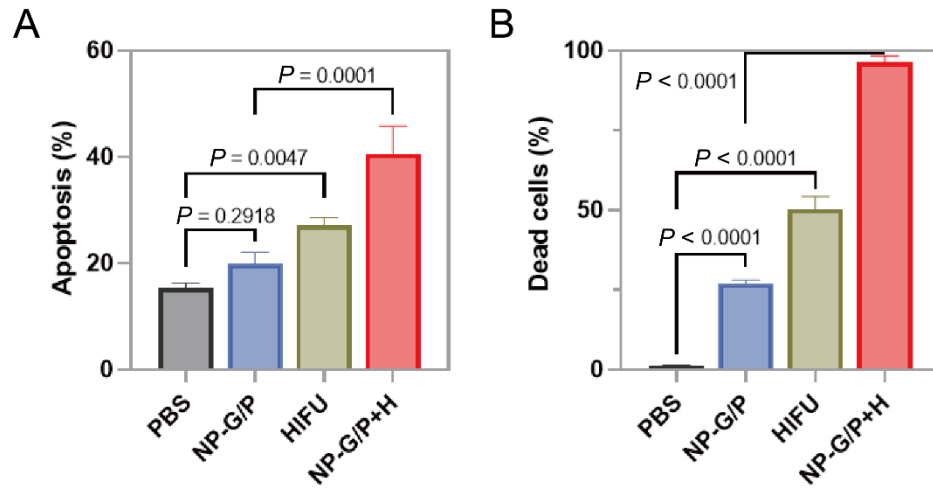

**Figure S14.** Cytotoxicity of HIFU-driven nanomotors *in vitro*. (A) Apoptosis analysis of 4T1 cells after different treatments determined by flow cytometry (n=3). (B) Live/dead cell assay of 4T1 cells after different treatments (n=3).

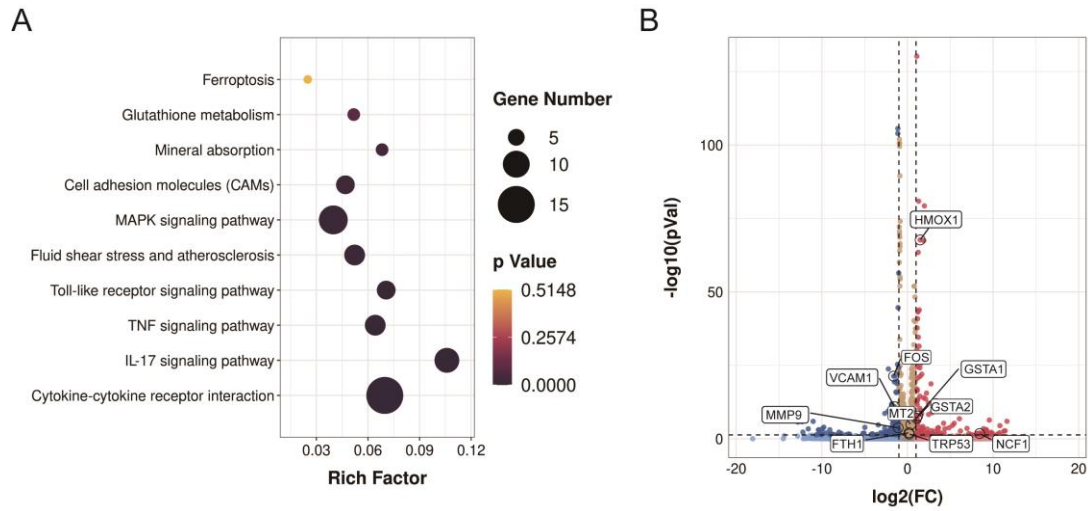

**Figure S15.** (A) The top 10 pathways in which differentially expressed genes of the NP-G/P+H group versus the NP-G/P group in 4T1 cells were enriched by the KEGG enrichment analysis. (B) The volcano map showed the upregulated and downregulated genes in 4T1 cells after NP-G/P+H treatment compared with PBS treatment. The screening criteria were  $FDR < 0.05$  and  $|\log_2 \text{fold change}| \geq 1$ .

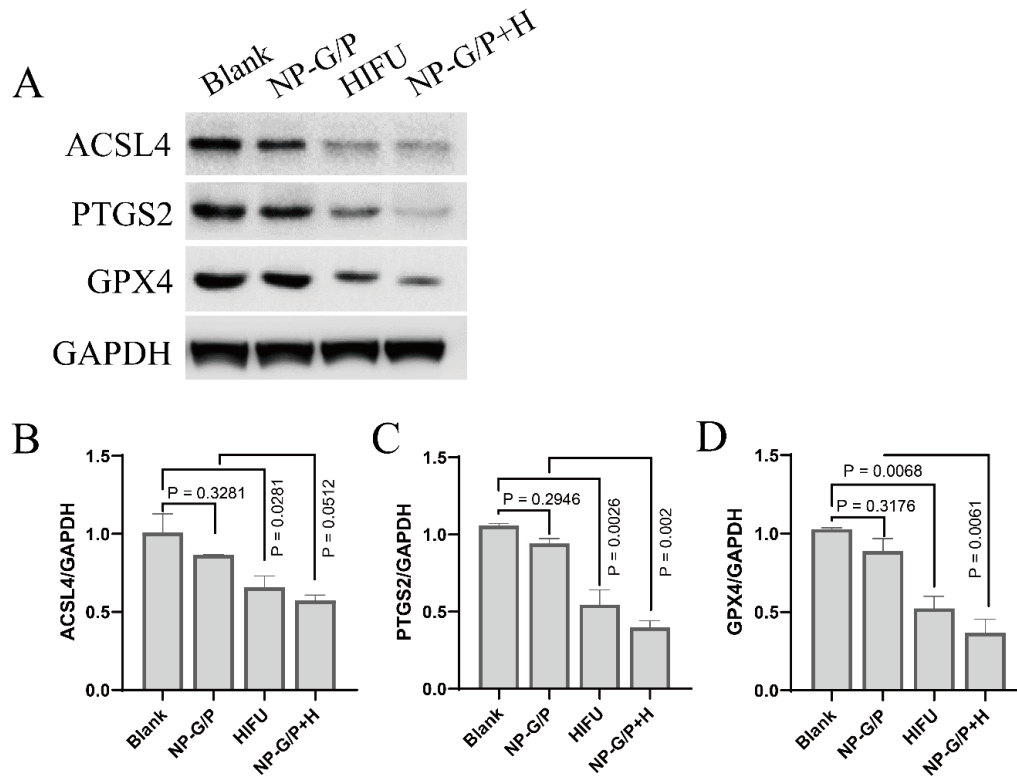

**Figure S16.** Western blot analyses of ACSL4, PTGS2, and GPX4 expression (**A**) in 4T1 cells after different treatments and the corresponding semi-quantitation results (**B-D**).

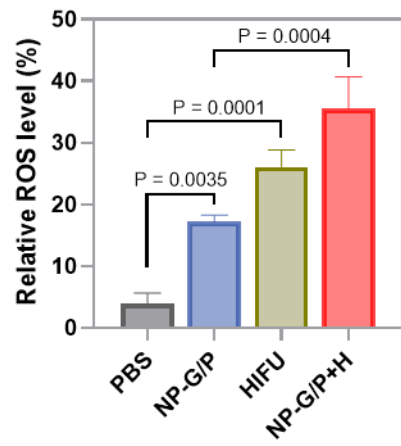

**Figure S17.** Relative intracellular ROS level in 4T1 cells after different treatments determined by flow cytometry (n=3).

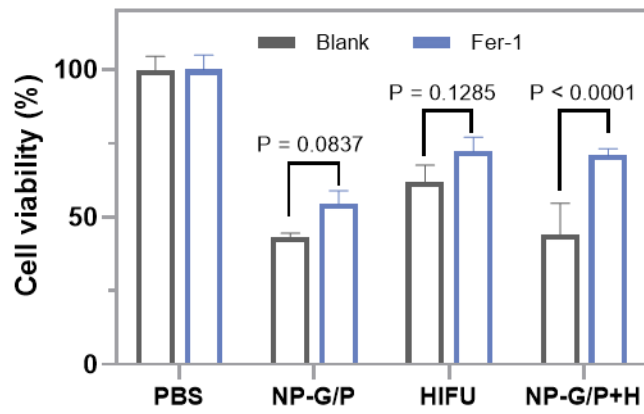

**Figure S18.** The viability of 4T1 cells after different treatments in the presence of Fer-1 determined by the CCK-8 method (n=3).

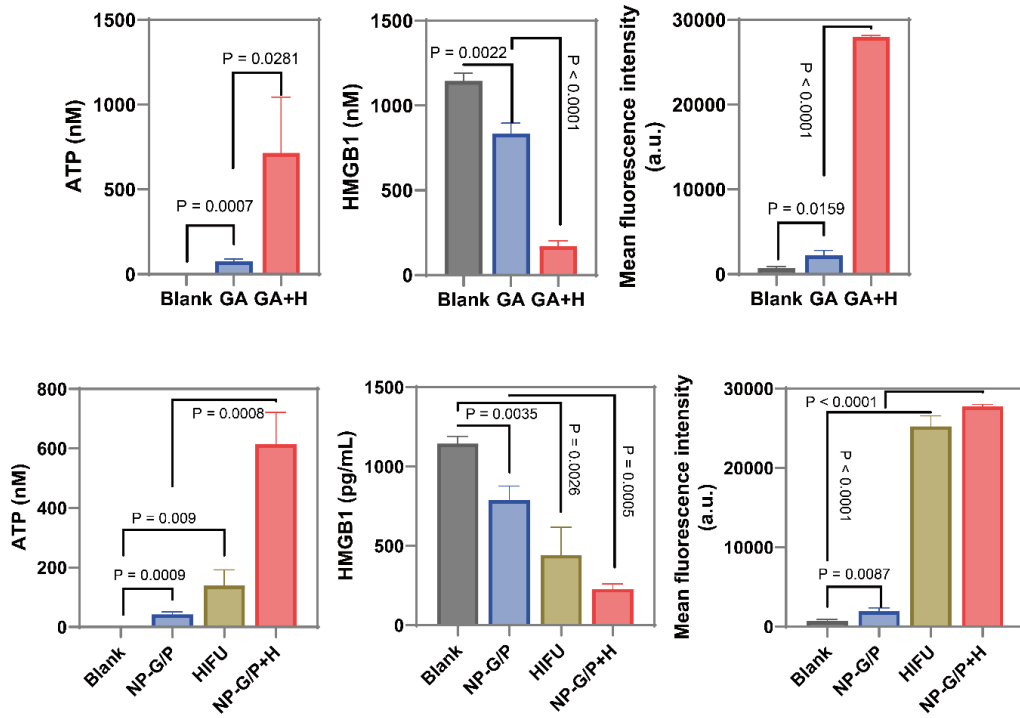

**Figure S19.** Extracellular ATP level, intracellular HMGB-1 level, and average fluorescence intensity of CRT from 4T1 cells after different treatments (n=3).

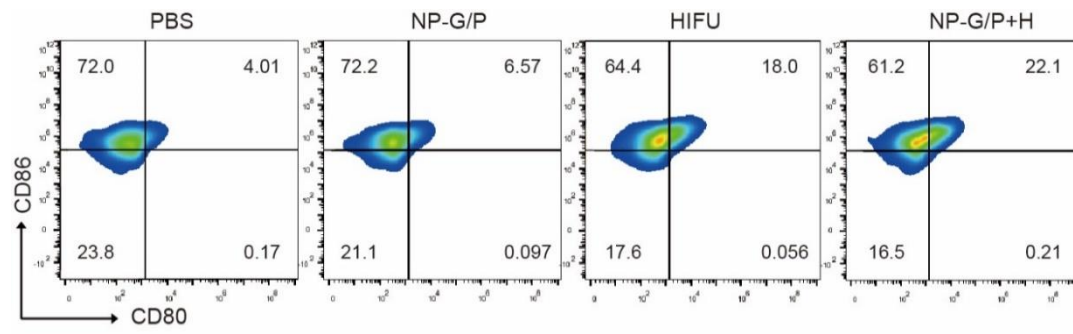

**Figure S20.** Representative flow cytometry charts of CD80<sup>+</sup>CD86<sup>+</sup> BMDC cells in different groups.



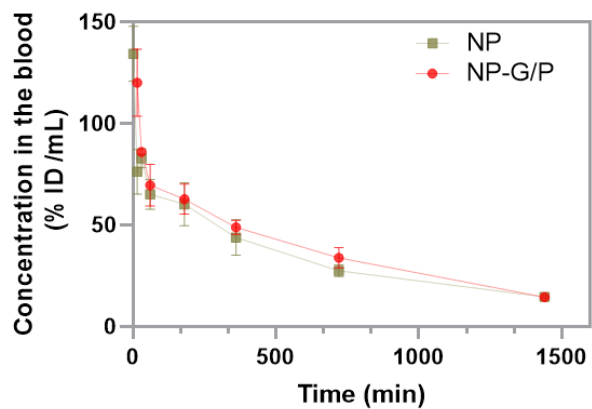

**Figure S21.** Concentration-time profiles of different formulations (NP and NP-G/P) in the mouse plasma after injection (n=3).

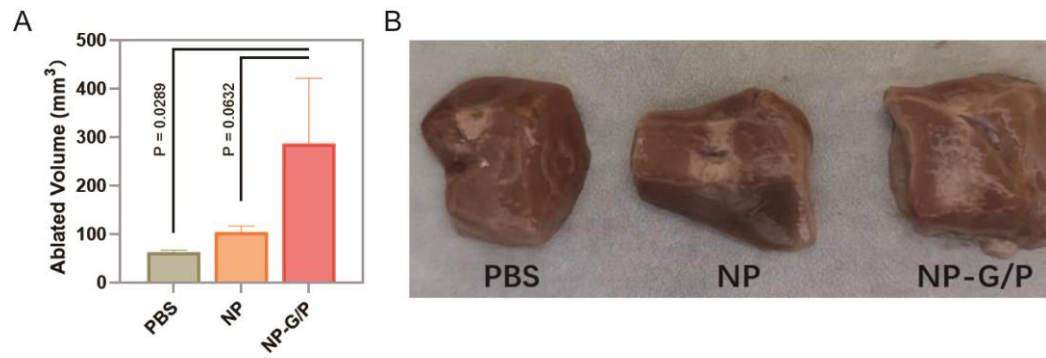

**Figure S22.** *Ex vivo* evaluation of the cavitation effect of nanomotors. (A) The radiation volume of pork livers injected with PBS, NP, or NP-G/P after HIFU irradiation at 8.5 W for 30 s (n=3). (B) Representative photographs of pork livers cut along the direction of HIFU irradiation.

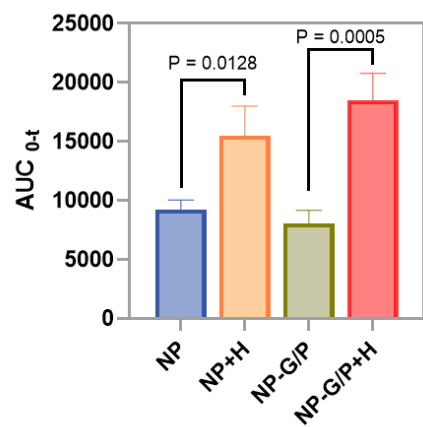

**Figure S23.** The estimated AUC of nanomotors at the tumor site based on *in vivo* fluorescence imaging (n=3).

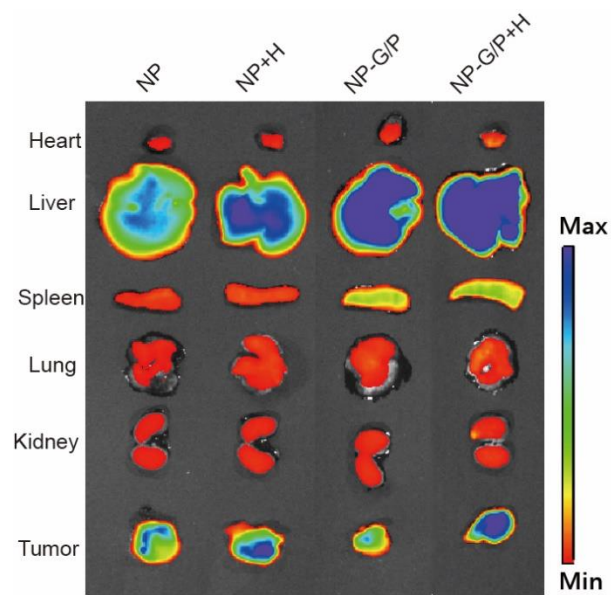

**Figure S24.** Representative *ex vivo* fluorescence images of major organs and tumors collected at 24 h after injection of nanomotors.

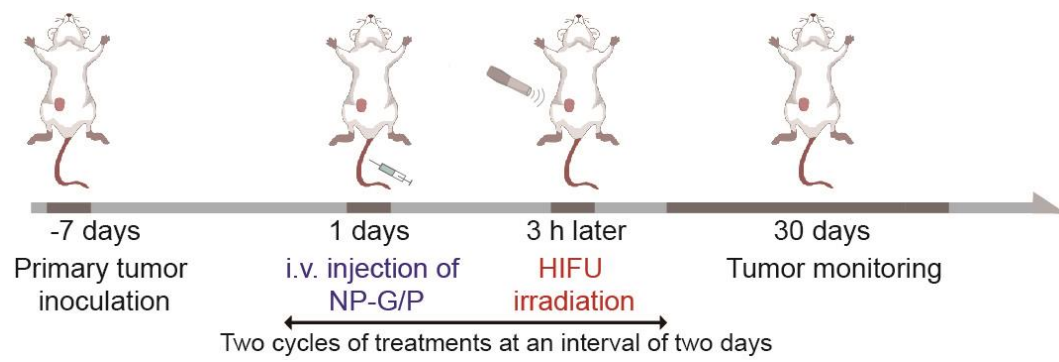

**Figure S25.** Schematic diagram of the experiment design using NP-G/P+H to treat mice bearing 4T1 tumors.

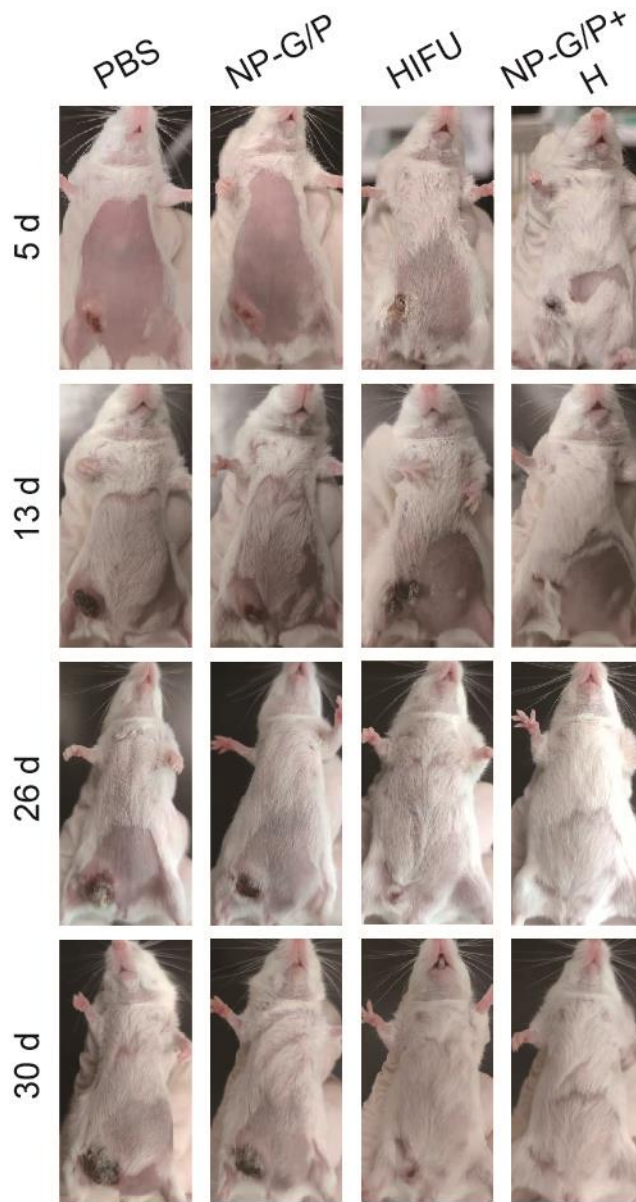

**Figure S26.** Representative photographs of primary tumors in the different treatment groups on Day 5, 13, 26, and 30.

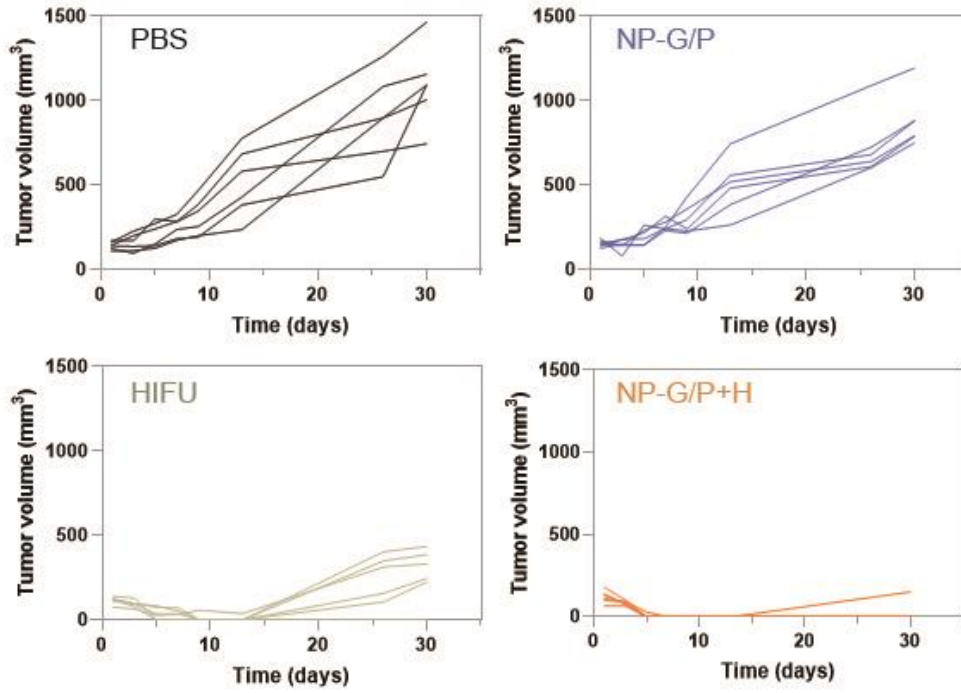

**Figure S27.** Tumor growth curves of primary tumors from individual mouse in different treatment groups (n=6).

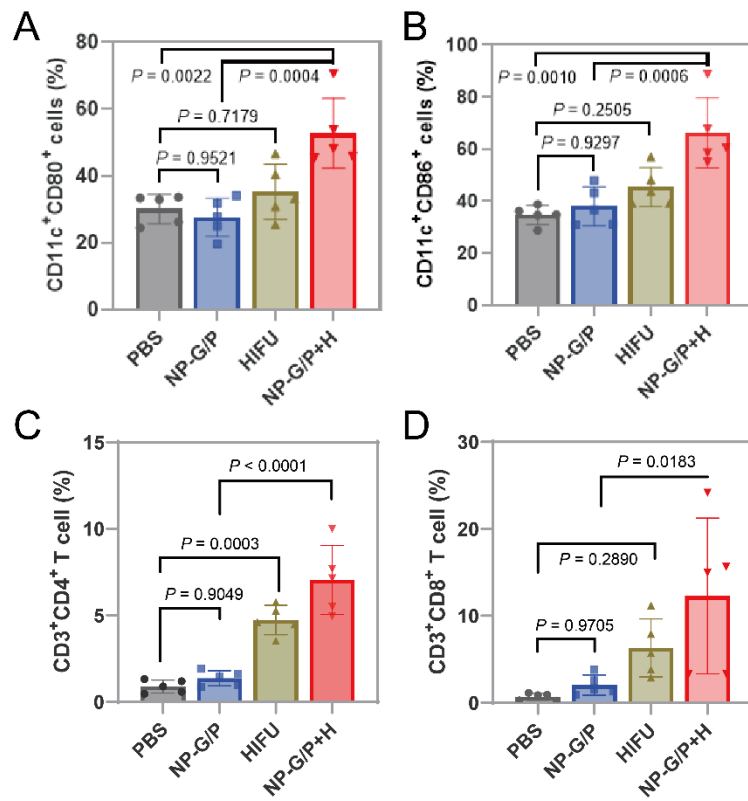

**Figure S28.** The antitumor immunity induced by HIFU-driven nanomotors on TNBC models. **(A,B)** Percentages of CD80<sup>+</sup> **(A)** and CD86<sup>+</sup> **(B)** in CD11c<sup>+</sup> DCs from the tumor-draining lymph nodes after different treatments detected by flow cytometry (n=5). **(C,D)** Percentages of CD4<sup>+</sup> **(C)** and CD8<sup>+</sup> **(D)** T cells in primary tumors after different treatments detected by flow cytometry (n=5).



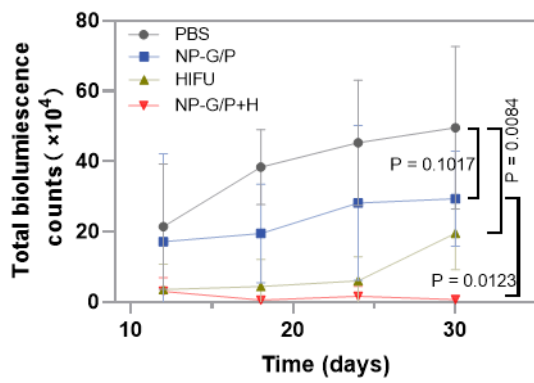

**Figure S29.** Bioluminescence intensity of mice at different time points after various treatments (n=5).

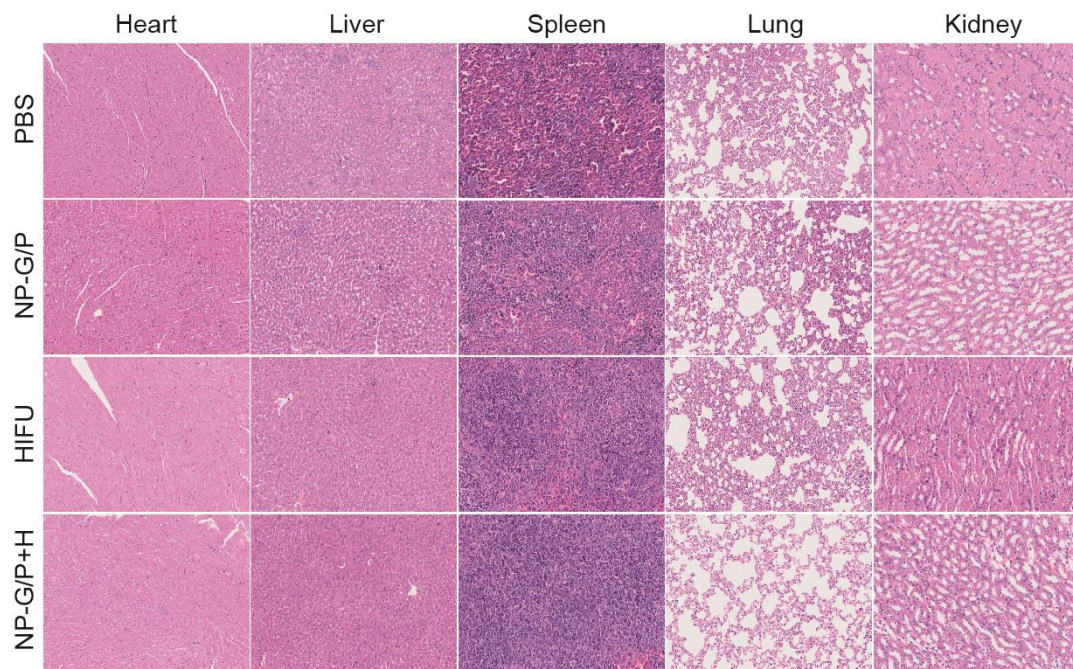

**Figure S30.** Representative images of H&E-stained slices from major organs after different treatments.

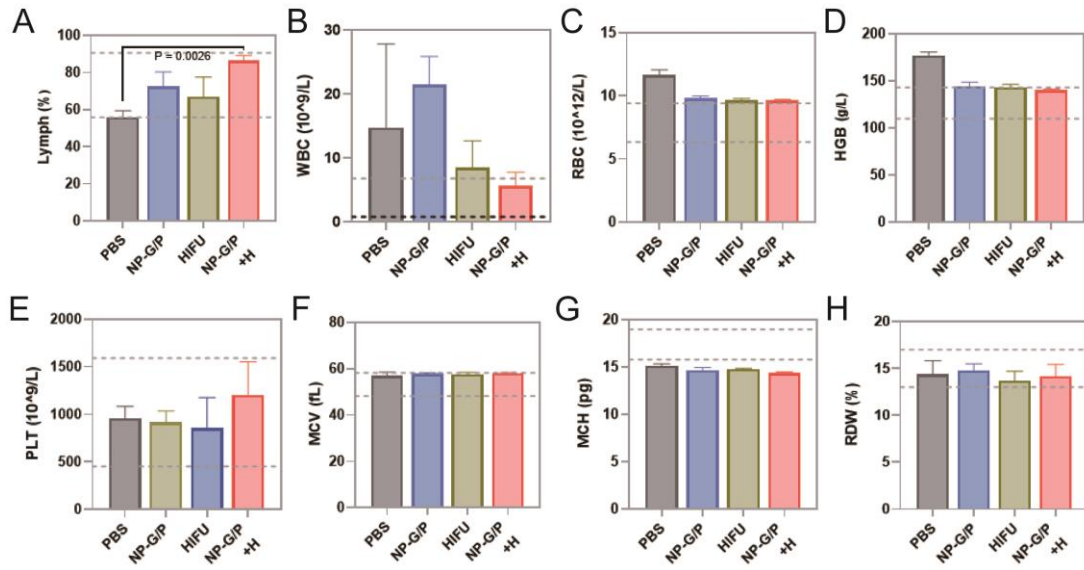

**Figure S31.** Hematology data in 4T1 tumor-bearing BALB/c mice after various treatments (n=3).

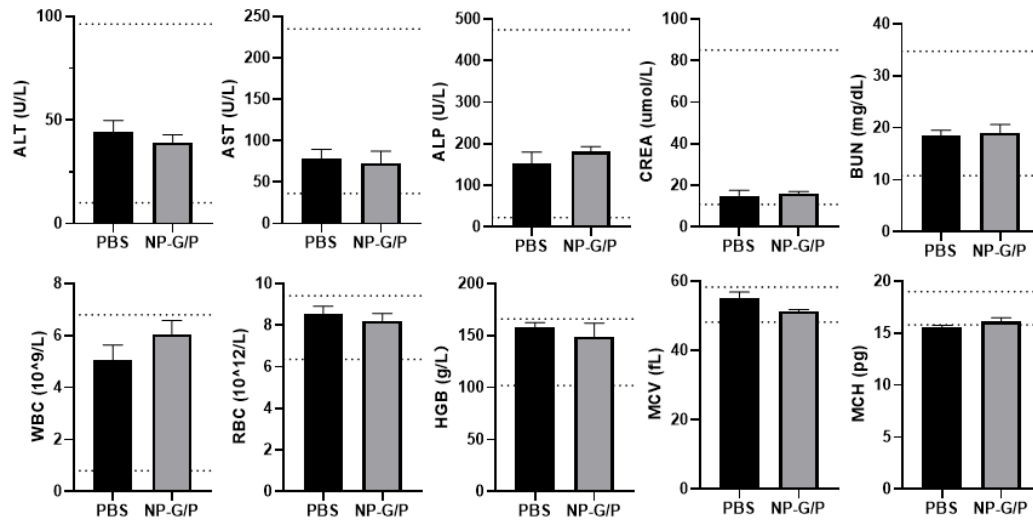

**Figure S32.** Hematology data in healthy BALB/c mice after PBS and NP-G/P treatments (n=3).

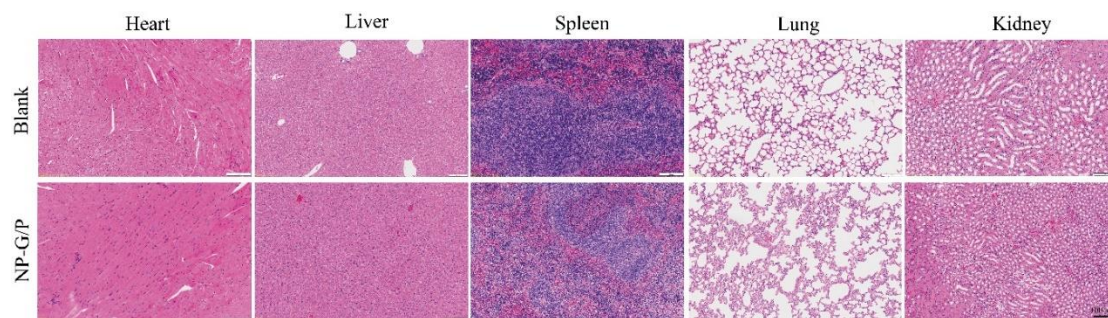

**Figure S33.** Representative images of H&E-stained slices from major organs in healthy mice after different treatments.

**Table S1. Swiss target prediction of GA**

| <b>Target</b>                                               | <b>Common name</b> | <b>Target Class</b>                 | <b>Probability*</b> | <b>Known actives (3D/2D)</b> |
|-------------------------------------------------------------|--------------------|-------------------------------------|---------------------|------------------------------|
| Inhibitor of nuclear factor kappa B kinase beta subunit     | IKBKB              | Kinase                              | 1                   | 11/4                         |
| Thioredoxin                                                 | TXN                | Unclassified protein                | 1                   | 1/1                          |
| Thioredoxin, mitochondrial                                  | TXN2               | Unclassified protein                | 1                   | 1/1                          |
| Induced myeloid leukemia cell differentiation protein Mcl-1 | MCL1               | Other cytosolic protein             | 1                   | 27/1                         |
| Caspase-1                                                   | CASP1              | Protease                            | 0.035898205         | 257/0                        |
| Signal transducer and activator of transcription 3          | STAT3              | Transcription factor                | 0.035898205         | 31/0                         |
| Signal transducer and activator of transcription 5B         | STAT5B             | Transcription factor                | 0.035898205         | 9/0                          |
| Type-1 angiotensin II receptor (by homology)                | AGTR1              | Family A G protein-coupled receptor | 0.035898205         | 143/0                        |
| Chymase                                                     | CMA1               | Protease                            | 0.035898205         | 46/0                         |
| Beta-secretase 1                                            | BACE1              | Protease                            | 0.035898205         | 97/0                         |
| Steroid 5-alpha-reductase 1                                 | SRD5A1             | Oxidoreductase                      | 0.035898205         | 6/0                          |
| Steroid 5-alpha-reductase 2                                 | SRD5A2             | Oxidoreductase                      | 0.035898205         | 8/0                          |
| Metabotropic glutamate receptor 2 (by homology)             | GRM2               | Family C G protein-coupled receptor | 0.035898205         | 36/0                         |
| Leukocyte elastase                                          | ELANE              | Protease                            | 0.035898205         | 43/0                         |
| Sphingosine 1-phosphate receptor Edg-5                      | S1PR2              | Family A G protein-coupled receptor | 0.035898205         | 20/0                         |
| Integrin alpha-4/beta-1                                     | ITGB1<br>ITGA4     | Membrane receptor                   | 0.035898205         | 412/0                        |
| Prostanoid EP1 receptor (by homology)                       | PTGER1             | Family A G protein-coupled receptor | 0.035898205         | 47/0                         |
| Adenosine A2a receptor                                      | ADORA2A            | Family A G protein-coupled receptor | 0.035898205         | 26/0                         |
| Adenosine A2b receptor                                      | ADORA2B            | Family A G protein-coupled receptor | 0.035898205         | 11/0                         |
| Renin                                                       | REN                | Protease                            | 0.035898205         | 149/0                        |
| Cysteinyl leukotriene receptor 1                            | CYSLTR1            | Family A G protein-coupled receptor | 0.035898205         | 34/0                         |
| Ileal bile acid transporter                                 | SLC10A2            | Electrochemical transporter         | 0.035898205         | 26/0                         |
| G protein-coupled receptor 44                               | PTGDR2             | Family A G protein-coupled          | 0.035898205         | 264/0                        |

|                                                                         |              |                                           |             |       |
|-------------------------------------------------------------------------|--------------|-------------------------------------------|-------------|-------|
|                                                                         |              | receptor                                  |             |       |
| Inosine-5'-<br>monophosphate<br>dehydrogenase 1                         | IMPDH1       | Oxidoreductase                            | 0.035898205 | 15/0  |
| Thymidylate<br>synthase (by<br>homology)                                | TYMS         | Transferase                               | 0.035898205 | 49/0  |
| Signal transducer<br>and activator of<br>transcription 1-<br>alpha/beta | STAT1        | Transcription factor                      | 0.035898205 | 2/0   |
| Serine/threonine-<br>protein kinase<br>Aurora-B                         | AURKB        | Kinase                                    | 0.035898205 | 30/0  |
| Inhibitor of nuclear<br>factor kappa B<br>kinase epsilon<br>subunit     | IKBKE        | Kinase                                    | 0.035898205 | 5/0   |
| Serine/threonine-<br>protein kinase<br>TBK1                             | TBK1         | Kinase                                    | 0.035898205 | 5/0   |
| Tyrosinase                                                              | TYR          | Oxidoreductase                            | 0.035898205 | 4/0   |
| Protein<br>farnesyltransferase                                          | FNTA<br>FNTB | Enzyme                                    | 0.035898205 | 150/0 |
| Cathepsin D                                                             | CTSD         | Protease<br>Family A G                    | 0.035898205 | 17/0  |
| Motilin receptor                                                        | MLNR         | protein-coupled<br>receptor               | 0.035898205 | 3/0   |
| Caspase-3                                                               | CASP3        | Protease                                  | 0.035898205 | 163/0 |
| 5-lipoxygenase<br>activating protein                                    | ALOX5AP      | Other cytosolic<br>protein                | 0.035898205 | 140/0 |
| Caspase-2                                                               | CASP2        | Protease                                  | 0.035898205 | 22/0  |
| Bile acid receptor<br>FXR                                               | NR1H4        | Nuclear receptor                          | 0.035898205 | 49/0  |
| Receptor-type<br>tyrosine-protein<br>phosphatase S                      | PTPRS        | Phosphatase                               | 0.035898205 | 3/0   |
| Coagulation factor<br>XI                                                | F11          | Protease                                  | 0.035898205 | 32/0  |
| T-cell protein-<br>tyrosine<br>phosphatase                              | PTPN2        | Phosphatase                               | 0.035898205 | 43/0  |
| FK506-binding<br>protein 1A                                             | FKBP1A       | Isomerase                                 | 0.035898205 | 86/0  |
| Peptidyl-prolyl cis-<br>trans isomerase<br>FKBP5                        | FKBP5        | Enzyme                                    | 0.035898205 | 19/0  |
| Calcitonin gene-<br>related peptide type<br>1 receptor                  | CALCRL       | Family B G<br>protein-coupled<br>receptor | 0.035898205 | 3/0   |
| FK506 binding<br>protein 4                                              | FKBP4        | Enzyme                                    | 0.035898205 | 11/0  |
| Angiotensin II<br>receptor                                              | AGTR2        | Family A G<br>protein-coupled<br>receptor | 0.035898205 | 38/0  |
| Signal transducer<br>and activator of                                   | STAT5A       | Transcription factor                      | 0.035898205 | 1/0   |

|                                                                           |                |                                           |             |       |  |
|---------------------------------------------------------------------------|----------------|-------------------------------------------|-------------|-------|--|
| transcription 5A                                                          |                |                                           |             |       |  |
| TRAIL receptor-1                                                          | TNFRSF10A      | Membrane receptor                         | 0.035898205 | 1/0   |  |
| MAP kinase p38<br>alpha                                                   | MAPK14         | Kinase                                    | 0.035898205 | 42/0  |  |
| Cholecystokinin A<br>receptor                                             | CCKAR          | Family A G<br>protein-coupled<br>receptor | 0.035898205 | 63/0  |  |
| Purinergic receptor<br>P2Y12                                              | P2RY12         | Family A G<br>protein-coupled<br>receptor | 0.035898205 | 247/0 |  |
| Cholecystokinin B<br>receptor                                             | CCKBR          | Family A G<br>protein-coupled<br>receptor | 0.035898205 | 479/0 |  |
| Nepriylsin (by<br>homology)                                               | MME            | Protease                                  | 0.035898205 | 95/0  |  |
| Pepsinogen C (by<br>homology)                                             | PGC            | Protease                                  | 0.035898205 | 3/0   |  |
| Protein kinase C<br>beta                                                  | PRKCB          | Kinase                                    | 0.035898205 | 5/0   |  |
| Chromobox protein<br>homolog 7                                            | CBX7           | Reader                                    | 0.035898205 | 7/0   |  |
| Integrin alpha-<br>V/beta-3                                               | ITGAV<br>ITGB3 | Membrane receptor                         | 0.035898205 | 504/0 |  |
| Phosphodiesterase<br>5A                                                   | PDE5A          | Phosphodiesterase                         | 0.035898205 | 59/0  |  |
| Membrane-<br>associated<br>guanylate kinase-<br>related 3                 | MAGI3          | Enzyme                                    | 0.035898205 | 5/0   |  |
| Egl nine homolog 1                                                        | EGLN1          | Oxidoreductase                            | 0.035898205 | 9/0   |  |
| Angiotensin-<br>converting enzyme<br>(by homology)                        | ACE            | Protease                                  | 0.035898205 | 82/0  |  |
| Vitamin D receptor                                                        | VDR            | Nuclear receptor<br>Family B G            | 0.035898205 | 23/0  |  |
| Glucagon receptor                                                         | GCGR           | protein-coupled<br>receptor               | 0.035898205 | 135/0 |  |
| Plasminogen<br>activator inhibitor-1                                      | SERPINE1       | Secreted protein                          | 0.035898205 | 23/0  |  |
| Transient receptor<br>potential cation<br>channel subfamily<br>M member 8 | TRPM8          | Voltage-gated ion<br>channel              | 0           | 37/0  |  |
| Thrombin                                                                  | F2             | Protease                                  | 0           | 76/0  |  |
| Thromboxane A2<br>receptor                                                | TBXA2R         | Family A G<br>protein-coupled<br>receptor | 0           | 125/0 |  |
| Neurokinin 1<br>receptor                                                  | TACR1          | Family A G<br>protein-coupled<br>receptor | 0           | 9/0   |  |
| Cytosolic<br>phospholipase A2                                             | PLA2G4A        | Enzyme                                    | 0           | 91/0  |  |
| Calpain 1                                                                 | CAPN1          | Protease                                  | 0           | 12/0  |  |
| Leukocyte adhesion<br>glycoprotein LFA-1<br>alpha                         | ITGAL          | Adhesion                                  | 0           | 17/0  |  |
| Histone deacetylase                                                       | HDAC1          | Eraser                                    | 0           | 30/0  |  |



|                                                |                |                                     |   |       |
|------------------------------------------------|----------------|-------------------------------------|---|-------|
| 1                                              |                |                                     |   |       |
| Caspase-8                                      | CASP8          | Protease                            | 0 | 75/0  |
| G-protein coupled receptor kinase 2            | GRK2           | Kinase                              | 0 | 1/0   |
| Calcium sensing receptor                       | CASR           | Family C G protein-coupled receptor | 0 | 24/0  |
| Plectin                                        | PLEC           | Unclassified protein                | 0 | 5/0   |
| Vasopressin V2 receptor                        | AVPR2          | Family A G protein-coupled receptor | 0 | 22/0  |
| Vasopressin V1a receptor                       | AVPR1A         | Family A G protein-coupled receptor | 0 | 16/0  |
| Epoxide hydratase                              | EPHX2          | Protease                            | 0 | 33/0  |
| HLA class II histocompatibility antigen DRB3-1 | HLA-DRB3       | Surface antigen                     | 0 | 8/0   |
| Cathepsin (B and K)                            | CTSB           | Protease                            | 0 | 30/0  |
| Nuclear receptor ROR-gamma                     | RORC           | Nuclear receptor                    | 0 | 3/0   |
| Carbonic anhydrase II                          | CA2            | Lyase                               | 0 | 48/0  |
| Integrin alpha-4/beta-7                        | ITGB7<br>ITGA4 | Membrane receptor                   | 0 | 123/0 |
| Aldo-keto-reductase family 1 member C3         | AKR1C3         | Enzyme                              | 0 | 16/0  |
| Histone deacetylase 3                          | HDAC3          | Eraser                              | 0 | 12/0  |
| Serotonin 4 (5-HT4) receptor                   | HTR4           | Family A G protein-coupled receptor | 0 | 7/0   |
| Histone deacetylase 2                          | HDAC2          | Eraser                              | 0 | 9/0   |
| Integrin alpha-5/beta-1                        | ITGB1<br>ITGA5 | Membrane receptor                   | 0 | 54/0  |
| Integrin alpha-V/beta-5                        | ITGB5<br>ITGAV | Membrane receptor                   | 0 | 70/0  |
| Histone deacetylase 8                          | HDAC8          | Eraser                              | 0 | 10/0  |
| Histone deacetylase 11                         | HDAC11         | Eraser                              | 0 | 9/0   |
| Endothelin-converting enzyme 1                 | ECE1           | Protease                            | 0 | 77/0  |
| Histone deacetylase 10                         | HDAC10         | Eraser                              | 0 | 9/0   |
| Cyclin-dependent kinase 5/CDK5 activator 1     | CDK5R1<br>CDK5 | Kinase                              | 0 | 28/0  |
| Lysosomal Pro-X carboxypeptidase               | PRCP           | Protease                            | 0 | 1/0   |
| Protein phosphatase 2A regulatory              | PTPA           | Phosphatase                         | 0 | 3/0   |

|                         |         |                           |   |      |  |
|-------------------------|---------|---------------------------|---|------|--|
| subunit B'              |         |                           |   |      |  |
| Thrombopoietin receptor | MPL     | Membrane receptor         | 0 | 6/0  |  |
| ADAMTS5                 | ADAMTS5 | Protease                  | 0 | 12/0 |  |
| ADAMTS4                 | ADAMTS4 | Protease                  | 0 | 16/0 |  |
| HERG                    | KCNH2   | Voltage-gated ion channel | 0 | 27/0 |  |

**Table S2. Relevant parameters of the amino acids binding between TRX and GA.**

| CurPocket ID | Vina score | Cavity volume (Å <sup>3</sup> ) | Center (x,y,z) | Docking size (x,y,z) |                                                                                                                                                                                                                                                                  |
|--------------|------------|---------------------------------|----------------|----------------------|------------------------------------------------------------------------------------------------------------------------------------------------------------------------------------------------------------------------------------------------------------------|
| C4           | -8.1       | 190                             | 48,7,63        | 24,24,24             | Chain A: HIS-2 GLY-1 SER0 THR1 PHE3 ASP13 ARG14 ASN17 SER18 GLU19 THR20 HIS49 GLY50 LYS51 VAL53<br>Chain A: GLU70 SER72 ALA73; Chain B: GLY32 PRO33 VAL74 PRO75 VAL90 GLY91 ILE92; Chain E: VAL85 VAL86 ASP87 LYS88 PHE89 VAL90 LYS93 GLN97 ALA100 PHE101 LYS104 |
| C1           | -7.8       | 15970                           | 35,17,37       | 35,34,35             | Chain B: GLU19 PRO21 GLY50 LYS51 LYS81 ASN82 LEU105 ILE106 GLY107; Chain C: ILE36 PRO39 ARG40 LYS43 GLU95                                                                                                                                                        |
| C5           | -6.7       | 189                             | 44,21,9        | 24,24,24             | Chain A: GLU19 THR20 PRO21 GLY50 LYS51 LYS81 ASN82 LEU105 ILE106 GLY107; Chain F: ILE36 PRO39 ARG40 LYS43 GLU95                                                                                                                                                  |
| C3           | -5.8       | 220                             | 34,13,67       | 24,24,24             | Chain E: HIS-2 THR1 SER18 GLU19 THR20 PRO21 HIS49 GLY50 LYS51 VAL52 VAL53 LYS81 ILE106                                                                                                                                                                           |
| C2           | -5.7       | 261                             | 9,2,31         | 24,24,24             |                                                                                                                                                                                                                                                                  |

**Table S3. Pharmacokinetic parameters of NP and NP-G/P in mice**

| Parameters                    | NP         | NP-G/P     |
|-------------------------------|------------|------------|
| t <sub>1/2</sub> (h)          | 11.38±1.31 | 10.97±0.13 |
| AUC <sub>0-∞</sub> (%ID/mL*h) | 3.01±0.10  | 3.32±0.21  |
| CI (L/h/kg)                   | 8.41±0.27  | 7.55±0.48  |
